# Supplementary material
Source: publisher site journal article supplement (http://www.spandidos-publications.com/6227/downloadSupplementary)
Supplement: Supplementary file 1 [file downloadSupplementary]

## Sheet: KEGG
Table SII. All results of enrichment analysis
ID	Description	GeneRatio	BgRatio	pvalue	p.adjust	qvalue	geneID	Count
hsa04270	Vascular smooth muscle contraction	2023-03-14	134/8223	0.0013504	0.124237	0.109453	5500/5567/133	3
hsa04720	Long-term potentiation	2023-02-14	67/8223	0.00558723	0.181451	0.159859	5500/5567	2
hsa05031	Amphetamine addiction	2023-02-14	69/8223	0.00591687	0.181451	0.159859	5500/5567	2
hsa04750	Inflammatory mediator regulation of TRP channels	2023-02-14	98/8223	0.0116547	0.228841	0.201611	5500/5567	2
hsa04611	Platelet activation	2023-02-14	124/8223	0.0182339	0.228841	0.201611	5500/5567	2
hsa04114	Oocyte meiosis	2023-02-14	131/8223	0.0202218	0.228841	0.201611	5500/5567	2
hsa04728	Dopaminergic synapse	2023-02-14	132/8223	0.020513	0.228841	0.201611	5500/5567	2
hsa04910	Insulin signaling pathway	2023-02-14	137/8223	0.0219958	0.228841	0.201611	5500/5567	2
hsa00730	Thiamine metabolism	2023-01-14	15/8223	0.0252573	0.228841	0.201611	249	1
hsa04261	Adrenergic signaling in cardiomyocytes	2023-02-14	154/8223	0.0273615	0.228841	0.201611	5500/5567	2
hsa04921	Oxytocin signaling pathway	2023-02-14	154/8223	0.0273615	0.228841	0.201611	5500/5567	2
hsa04621	NOD-like receptor signaling pathway	2023-02-14	186/8223	0.0387402	0.276858	0.243913	140609/5586	2
hsa05034	Alcoholism	2023-02-14	187/8223	0.0391212	0.276858	0.243913	5500/5567	2
hsa00790	Folate biosynthesis	2023-01-14	26/8223	0.0434013	0.283518	0.249781	249	1
hsa05205	Proteoglycans in cancer	2023-02-14	205/8223	0.0462258	0.283518	0.249781	5500/5567	2

## Sheet: GO_terms
	ONTOLOGY	ID	Description	GeneRatio	BgRatio	pvalue	p.adjust	qvalue	geneID	Count
GO:0007030	BP	GO:0007030	Golgi organization	3/43	165/18903	0.00623992	0.326059	0.300446	TMED5/TMED7/LYSMD3	3
GO:0001843	BP	GO:0001843	neural tube closure	2/43	92/18903	0.0185898	0.326059	0.300446	PRKACB/ADM	2
GO:0060606	BP	GO:0060606	tube closure	2/43	93/18903	0.0189713	0.326059	0.300446	PRKACB/ADM	2
GO:0014020	BP	GO:0014020	primary neural tube formation	2/43	98/18903	0.0209278	0.326059	0.300446	PRKACB/ADM	2
GO:0032204	BP	GO:0032204	regulation of telomere maintenance	2/43	101/18903	0.0221406	0.326059	0.300446	NEK7/SMC5	2
GO:0032815	BP	GO:0032815	negative regulation of natural killer cell activation	1/43	10/18903	0.0225216	0.326059	0.300446	PGLYRP1	1
GO:0046886	BP	GO:0046886	positive regulation of hormone biosynthetic process	1/43	10/18903	0.0225216	0.326059	0.300446	ADM	1
GO:0090161	BP	GO:0090161	Golgi ribbon formation	1/43	10/18903	0.0225216	0.326059	0.300446	TMED5	1
GO:1901620	BP	GO:1901620	regulation of smoothened signaling pathway involved in dorsal/ventral neural tube patterning	1/43	10/18903	0.0225216	0.326059	0.300446	PRKACB	1
GO:0001841	BP	GO:0001841	neural tube formation	2/43	106/18903	0.0242251	0.326059	0.300446	PRKACB/ADM	2
GO:2001252	BP	GO:2001252	positive regulation of chromosome organization	2/43	106/18903	0.0242251	0.326059	0.300446	NEK7/SMC5	2
GO:0035090	BP	GO:0035090	maintenance of apical/basal cell polarity	1/43	11/18903	0.0247463	0.326059	0.300446	LIN7C	1
GO:0042989	BP	GO:0042989	sequestering of actin monomers	1/43	11/18903	0.0247463	0.326059	0.300446	TWF1	1
GO:0045199	BP	GO:0045199	maintenance of epithelial cell apical/basal polarity	1/43	11/18903	0.0247463	0.326059	0.300446	LIN7C	1
GO:0045793	BP	GO:0045793	positive regulation of cell size	1/43	11/18903	0.0247463	0.326059	0.300446	TMEM123	1
GO:0034058	BP	GO:0034058	endosomal vesicle fusion	1/43	12/18903	0.0269661	0.326059	0.300446	SAMD9	1
GO:0034086	BP	GO:0034086	maintenance of sister chromatid cohesion	1/43	12/18903	0.0269661	0.326059	0.300446	SMC5	1
GO:0034088	BP	GO:0034088	maintenance of mitotic sister chromatid cohesion	1/43	12/18903	0.0269661	0.326059	0.300446	SMC5	1
GO:0043248	BP	GO:0043248	proteasome assembly	1/43	12/18903	0.0269661	0.326059	0.300446	OTUD6B	1
GO:0097084	BP	GO:0097084	vascular associated smooth muscle cell development	1/43	12/18903	0.0269661	0.326059	0.300446	ADM	1
GO:1900227	BP	GO:1900227	positive regulation of NLRP3 inflammasome complex assembly	1/43	12/18903	0.0269661	0.326059	0.300446	NEK7	1
GO:2001214	BP	GO:2001214	positive regulation of vasculogenesis	1/43	12/18903	0.0269661	0.326059	0.300446	ADM	1
GO:0032823	BP	GO:0032823	regulation of natural killer cell differentiation	1/43	13/18903	0.0291809	0.326059	0.300446	PGLYRP1	1
GO:0035865	BP	GO:0035865	cellular response to potassium ion	1/43	13/18903	0.0291809	0.326059	0.300446	NEK7	1
GO:0060670	BP	GO:0060670	branching involved in labyrinthine layer morphogenesis	1/43	13/18903	0.0291809	0.326059	0.300446	ADM	1
GO:0060831	BP	GO:0060831	smoothened signaling pathway involved in dorsal/ventral neural tube patterning	1/43	13/18903	0.0291809	0.326059	0.300446	PRKACB	1
GO:0002756	BP	GO:0002756	MyD88-independent toll-like receptor signaling pathway	1/43	14/18903	0.0313908	0.326059	0.300446	RAB11FIP2	1
GO:0003014	BP	GO:0003014	renal system process	2/43	125/18903	0.0328366	0.326059	0.300446	PRKACB/ADM	2
GO:0000722	BP	GO:0000722	telomere maintenance via recombination	1/43	15/18903	0.0335958	0.326059	0.300446	SMC5	1
GO:0002031	BP	GO:0002031	G protein-coupled receptor internalization	1/43	15/18903	0.0335958	0.326059	0.300446	ADM	1
GO:0032352	BP	GO:0032352	positive regulation of hormone metabolic process	1/43	15/18903	0.0335958	0.326059	0.300446	ADM	1
GO:0034380	BP	GO:0034380	high-density lipoprotein particle assembly	1/43	15/18903	0.0335958	0.326059	0.300446	PRKACB	1
GO:0046512	BP	GO:0046512	sphingosine biosynthetic process	1/43	15/18903	0.0335958	0.326059	0.300446	SPTSSA	1
GO:0046520	BP	GO:0046520	sphingoid biosynthetic process	1/43	15/18903	0.0335958	0.326059	0.300446	SPTSSA	1
GO:0001838	BP	GO:0001838	embryonic epithelial tube formation	2/43	127/18903	0.0338039	0.326059	0.300446	PRKACB/ADM	2
GO:0002429	BP	GO:0002429	immune response-activating cell surface receptor signaling pathway	3/43	312/18903	0.0338227	0.326059	0.300446	IGHV2-5/KLRC4/TRAT1	3
GO:0002757	BP	GO:0002757	immune response-activating signal transduction	3/43	312/18903	0.0338227	0.326059	0.300446	IGHV2-5/KLRC4/TRAT1	3
GO:0006909	BP	GO:0006909	phagocytosis	3/43	314/18903	0.0343726	0.326059	0.300446	IGHV2-5/RAB11FIP2/PIP4P2	3
GO:0042448	BP	GO:0042448	progesterone metabolic process	1/43	16/18903	0.0357959	0.326059	0.300446	ADM	1
GO:0050862	BP	GO:0050862	positive regulation of T cell receptor signaling pathway	1/43	16/18903	0.0357959	0.326059	0.300446	TRAT1	1
GO:0051014	BP	GO:0051014	actin filament severing	1/43	16/18903	0.0357959	0.326059	0.300446	GMFB	1
GO:2001212	BP	GO:2001212	regulation of vasculogenesis	1/43	16/18903	0.0357959	0.326059	0.300446	ADM	1
GO:0006888	BP	GO:0006888	endoplasmic reticulum to Golgi vesicle-mediated transport	2/43	134/18903	0.0372762	0.326059	0.300446	TMED5/TMED7	2
GO:0042476	BP	GO:0042476	odontogenesis	2/43	135/18903	0.0377831	0.326059	0.300446	ALPL/ADM	2
GO:0006349	BP	GO:0006349	regulation of gene expression by genomic imprinting	1/43	17/18903	0.0379911	0.326059	0.300446	PCGF5	1
GO:0010566	BP	GO:0010566	regulation of ketone biosynthetic process	1/43	17/18903	0.0379911	0.326059	0.300446	ADM	1
GO:0016045	BP	GO:0016045	detection of bacterium	1/43	17/18903	0.0379911	0.326059	0.300446	PGLYRP1	1
GO:0036005	BP	GO:0036005	response to macrophage colony-stimulating factor	1/43	17/18903	0.0379911	0.326059	0.300446	ALPL	1
GO:1900006	BP	GO:1900006	positive regulation of dendrite development	1/43	17/18903	0.0379911	0.326059	0.300446	TMEM106B	1
GO:1904355	BP	GO:1904355	positive regulation of telomere capping	1/43	17/18903	0.0379911	0.326059	0.300446	NEK7	1
GO:0072175	BP	GO:0072175	epithelial tube formation	2/43	139/18903	0.0398372	0.326059	0.300446	PRKACB/ADM	2
GO:0035864	BP	GO:0035864	response to potassium ion	1/43	18/18903	0.0401814	0.326059	0.300446	NEK7	1
GO:0043116	BP	GO:0043116	negative regulation of vascular permeability	1/43	18/18903	0.0401814	0.326059	0.300446	ADM	1
GO:1905146	BP	GO:1905146	lysosomal protein catabolic process	1/43	18/18903	0.0401814	0.326059	0.300446	TMEM106B	1
GO:0051384	BP	GO:0051384	response to glucocorticoid	2/43	142/18903	0.0414052	0.326059	0.300446	ALPL/ADM	2
GO:0002768	BP	GO:0002768	immune response-regulating cell surface receptor signaling pathway	3/43	341/18903	0.0422503	0.326059	0.300446	IGHV2-5/KLRC4/TRAT1	3
GO:0006700	BP	GO:0006700	C21-steroid hormone biosynthetic process	1/43	20/18903	0.0445475	0.326059	0.300446	ADM	1
GO:0030011	BP	GO:0030011	maintenance of cell polarity	1/43	20/18903	0.0445475	0.326059	0.300446	LIN7C	1
GO:0045653	BP	GO:0045653	negative regulation of megakaryocyte differentiation	1/43	20/18903	0.0445475	0.326059	0.300446	GABPA	1
GO:0055062	BP	GO:0055062	phosphate ion homeostasis	1/43	20/18903	0.0445475	0.326059	0.300446	ALPL	1
GO:0072506	BP	GO:0072506	trivalent inorganic anion homeostasis	1/43	20/18903	0.0445475	0.326059	0.300446	ALPL	1
GO:0098543	BP	GO:0098543	detection of other organism	1/43	20/18903	0.0445475	0.326059	0.300446	PGLYRP1	1
GO:1900225	BP	GO:1900225	regulation of NLRP3 inflammasome complex assembly	1/43	20/18903	0.0445475	0.326059	0.300446	NEK7	1
GO:1903232	BP	GO:1903232	melanosome assembly	1/43	20/18903	0.0445475	0.326059	0.300446	AP1S2	1
GO:0002029	BP	GO:0002029	desensitization of G protein-coupled receptor signaling pathway	1/43	21/18903	0.0467232	0.326059	0.300446	ADM	1
GO:0006670	BP	GO:0006670	sphingosine metabolic process	1/43	21/18903	0.0467232	0.326059	0.300446	SPTSSA	1
GO:0007042	BP	GO:0007042	lysosomal lumen acidification	1/43	21/18903	0.0467232	0.326059	0.300446	TMEM106B	1
GO:0007063	BP	GO:0007063	regulation of sister chromatid cohesion	1/43	21/18903	0.0467232	0.326059	0.300446	SMC5	1
GO:0022401	BP	GO:0022401	negative adaptation of signaling pathway	1/43	21/18903	0.0467232	0.326059	0.300446	ADM	1
GO:0016311	BP	GO:0016311	dephosphorylation	3/43	357/18903	0.0473136	0.326059	0.300446	PIP4P2/ALPL/PPP1CB	3
GO:0016331	BP	GO:0016331	morphogenesis of embryonic epithelium	2/43	153/18903	0.0473497	0.326059	0.300446	PRKACB/ADM	2
GO:0000723	BP	GO:0000723	telomere maintenance	2/43	154/18903	0.0479049	0.326059	0.300446	NEK7/SMC5	2
GO:0035148	BP	GO:0035148	tube formation	2/43	155/18903	0.0484625	0.326059	0.300446	PRKACB/ADM	2
GO:0001919	BP	GO:0001919	regulation of receptor recycling	1/43	22/18903	0.0488941	0.326059	0.300446	TRAT1	1
GO:0002223	BP	GO:0002223	stimulatory C-type lectin receptor signaling pathway	1/43	22/18903	0.0488941	0.326059	0.300446	KLRC4	1
GO:0007039	BP	GO:0007039	protein catabolic process in the vacuole	1/43	22/18903	0.0488941	0.326059	0.300446	TMEM106B	1
GO:0035809	BP	GO:0035809	regulation of urine volume	1/43	22/18903	0.0488941	0.326059	0.300446	ADM	1
GO:0044546	BP	GO:0044546	NLRP3 inflammasome complex assembly	1/43	22/18903	0.0488941	0.326059	0.300446	NEK7	1
GO:0050765	BP	GO:0050765	negative regulation of phagocytosis	1/43	22/18903	0.0488941	0.326059	0.300446	PIP4P2	1
GO:0060713	BP	GO:0060713	labyrinthine layer morphogenesis	1/43	22/18903	0.0488941	0.326059	0.300446	ADM	1
GO:1990840	BP	GO:1990840	response to lectin	1/43	22/18903	0.0488941	0.326059	0.300446	KLRC4	1
GO:1990858	BP	GO:1990858	cellular response to lectin	1/43	22/18903	0.0488941	0.326059	0.300446	KLRC4	1
GO:0010976	BP	GO:0010976	positive regulation of neuron projection development	2/43	157/18903	0.0495848	0.326059	0.300446	TMEM106B/TWF1	2
GO:0000803	CC	GO:0000803	sex chromosome	2/42	31/19869	0.00195106	0.150044	0.120923	PCGF5/SMC5	2
GO:0031519	CC	GO:0031519	PcG protein complex	2/42	34/19869	0.00234443	0.150044	0.120923	PCGF5/AEBP2	2
GO:0030120	CC	GO:0030120	vesicle coat	2/42	57/19869	0.00646795	0.205838	0.165889	AP1S2/TMED7	2
GO:0030660	CC	GO:0030660	Golgi-associated vesicle membrane	2/42	57/19869	0.00646795	0.205838	0.165889	AP1S2/TMED7	2
GO:0033116	CC	GO:0033116	endoplasmic reticulum-Golgi intermediate compartment membrane	2/42	80/19869	0.01242	0.205838	0.165889	TMED5/TMED7	2
GO:0005798	CC	GO:0005798	Golgi-associated vesicle	2/42	89/19869	0.0152085	0.205838	0.165889	AP1S2/TMED7	2
GO:0030117	CC	GO:0030117	membrane coat	2/42	89/19869	0.0152085	0.205838	0.165889	AP1S2/TMED7	2
GO:0048475	CC	GO:0048475	coated membrane	2/42	89/19869	0.0152085	0.205838	0.165889	AP1S2/TMED7	2
GO:0009897	CC	GO:0009897	external side of plasma membrane	4/42	462/19869	0.0160892	0.205838	0.165889	IGHV2-5/TMEM123/KLRC4/CLEC2B	4
GO:0030134	CC	GO:0030134	COPII-coated ER to Golgi transport vesicle	2/42	95/19869	0.0172031	0.205838	0.165889	TMED5/TMED7	2
GO:0000805	CC	GO:0000805	X chromosome	1/42	10/19869	0.0209432	0.205838	0.165889	PCGF5	1
GO:0005952	CC	GO:0005952	cAMP-dependent protein kinase complex	1/42	10/19869	0.0209432	0.205838	0.165889	PRKACB	1
GO:0002178	CC	GO:0002178	palmitoyltransferase complex	1/42	11/19869	0.0230138	0.205838	0.165889	SPTSSA	1
GO:0030121	CC	GO:0030121	AP-1 adaptor complex	1/42	12/19869	0.0250802	0.205838	0.165889	AP1S2	1
GO:0030126	CC	GO:0030126	COPI vesicle coat	1/42	13/19869	0.0271422	0.205838	0.165889	TMED7	1
GO:0106068	CC	GO:0106068	SUMO ligase complex	1/42	13/19869	0.0271422	0.205838	0.165889	SMC5	1
GO:0030135	CC	GO:0030135	coated vesicle	3/42	310/19869	0.0275928	0.205838	0.165889	TMED5/AP1S2/TMED7	3
GO:0030127	CC	GO:0030127	COPII vesicle coat	1/42	15/19869	0.0312536	0.205838	0.165889	TMED7	1
GO:0035102	CC	GO:0035102	PRC1 complex	1/42	15/19869	0.0312536	0.205838	0.165889	PCGF5	1
GO:0005793	CC	GO:0005793	endoplasmic reticulum-Golgi intermediate compartment	2/42	133/19869	0.0321622	0.205838	0.165889	TMED5/TMED7	2
GO:0045335	CC	GO:0045335	phagocytic vesicle	2/42	139/19869	0.034864	0.208077	0.167694	PIP4P2/PGLYRP1	2
GO:0030130	CC	GO:0030130	clathrin coat of trans-Golgi network vesicle	1/42	18/19869	0.0373889	0.208077	0.167694	AP1S2	1
GO:0030663	CC	GO:0030663	COPI-coated vesicle membrane	1/42	18/19869	0.0373889	0.208077	0.167694	TMED7	1
GO:0043296	CC	GO:0043296	apical junction complex	2/42	151/19869	0.0405216	0.209133	0.168544	LIN7C/PKN2	2
GO:0012510	CC	GO:0012510	trans-Golgi network transport vesicle membrane	1/42	20/19869	0.041458	0.209133	0.168544	AP1S2	1
GO:0031902	CC	GO:0031902	late endosome membrane	2/42	155/19869	0.0424801	0.209133	0.168544	TMEM106B/PIP4P2	2
GO:0030137	CC	GO:0030137	COPI-coated vesicle	1/42	22/19869	0.0455103	0.209425	0.16878	TMED7	1
GO:0030131	CC	GO:0030131	clathrin adaptor complex	1/42	23/19869	0.0475302	0.209425	0.16878	AP1S2	1
GO:0071682	CC	GO:0071682	endocytic vesicle lumen	1/42	23/19869	0.0475302	0.209425	0.16878	PGLYRP1	1
GO:0000781	CC	GO:0000781	chromosome, telomeric region	2/42	168/19869	0.0490839	0.209425	0.16878	PPP1CB/SMC5	2
GO:0016811	MF	GO:0016811	hydrolase activity, acting on carbon-nitrogen (but not peptide) bonds, in linear amides	2/42	70/18432	0.0110987	0.204583	0.167973	MIER1/PGLYRP1	2
GO:0004690	MF	GO:0004690	cyclic nucleotide-dependent protein kinase activity	1/42	10/18432	0.0225597	0.204583	0.167973	PRKACB	1
GO:0034596	MF	GO:0034596	phosphatidylinositol phosphate 4-phosphatase activity	1/42	10/18432	0.0225597	0.204583	0.167973	PIP4P2	1
GO:0016791	MF	GO:0016791	phosphatase activity	3/42	276/18432	0.024814	0.204583	0.167973	PIP4P2/ALPL/PPP1CB	3
GO:0061783	MF	GO:0061783	peptidoglycan muralytic activity	1/42	14/18432	0.0314438	0.204583	0.167973	PGLYRP1	1
GO:0106019	MF	GO:0106019	phosphatidylinositol-4,5-bisphosphate phosphatase activity	1/42	14/18432	0.0314438	0.204583	0.167973	PIP4P2	1
GO:0017110	MF	GO:0017110	nucleoside diphosphate phosphatase activity	1/42	15/18432	0.0336524	0.204583	0.167973	ALPL	1
GO:0071933	MF	GO:0071933	Arp2/3 complex binding	1/42	15/18432	0.0336524	0.204583	0.167973	GMFB	1
GO:0016810	MF	GO:0016810	hydrolase activity, acting on carbon-nitrogen (but not peptide) bonds	2/42	128/18432	0.0343854	0.204583	0.167973	MIER1/PGLYRP1	2
GO:0042826	MF	GO:0042826	histone deacetylase binding	2/42	128/18432	0.0343854	0.204583	0.167973	MIER1/PKN2	2
GO:0004698	MF	GO:0004698	calcium-dependent protein kinase C activity	1/42	16/18432	0.0358562	0.204583	0.167973	PKN2	1
GO:0005068	MF	GO:0005068	transmembrane receptor protein tyrosine kinase adaptor activity	1/42	16/18432	0.0358562	0.204583	0.167973	TRAT1	1
GO:0004697	MF	GO:0004697	protein kinase C activity	1/42	17/18432	0.038055	0.204583	0.167973	PKN2	1
GO:0032393	MF	GO:0032393	MHC class I receptor activity	1/42	17/18432	0.038055	0.204583	0.167973	KLRF1	1
GO:0035615	MF	GO:0035615	clathrin adaptor activity	1/42	18/18432	0.040249	0.204583	0.167973	AP1S2	1
GO:0042834	MF	GO:0042834	peptidoglycan binding	1/42	18/18432	0.040249	0.204583	0.167973	PGLYRP1	1
GO:0140312	MF	GO:0140312	cargo adaptor activity	1/42	19/18432	0.0424381	0.204583	0.167973	AP1S2	1
GO:0004407	MF	GO:0004407	histone deacetylase activity	1/42	20/18432	0.0446223	0.204583	0.167973	MIER1	1
GO:0016408	MF	GO:0016408	C-acyltransferase activity	1/42	20/18432	0.0446223	0.204583	0.167973	SPTSSA	1
GO:0033558	MF	GO:0033558	protein lysine deacetylase activity	1/42	21/18432	0.0468016	0.204583	0.167973	MIER1	1
GO:0009931	MF	GO:0009931	calcium-dependent protein serine/threonine kinase activity	1/42	22/18432	0.0489761	0.204583	0.167973	PKN2	1
GO:0106310	MF	GO:0106310	protein serine kinase activity	3/42	363/18432	0.0494509	0.204583	0.167973	NEK7/PKN2/PRKACB	3

## Sheet: DO
Table SII. All results of enrichment analysis
ID	Description	GeneRatio	BgRatio	pvalue	p.adjust	qvalue	geneID	Count
DOID:2349	arteriosclerosis	2023-04-14	411/10312	0.00181035	0.193414	0.153392	ALPL/SAMD9/ADM/PGLYRP1	4
DOID:10579	leukodystrophy	2023-02-14	90/10312	0.00640319	0.193414	0.153392	TMEM106B/ADM	2
DOID:1936	atherosclerosis	2023-03-14	364/10312	0.0118823	0.193414	0.153392	SAMD9/ADM/PGLYRP1	3
DOID:2348	arteriosclerotic cardiovascular disease	2023-03-14	365/10312	0.0119712	0.193414	0.153392	SAMD9/ADM/PGLYRP1	3
DOID:1443	cerebral degeneration	2023-02-14	133/10312	0.0135749	0.193414	0.153392	TMEM106B/ADM	2
DOID:3918	pancreatic cystadenoma	2023-01-14	11/10312	0.0148402	0.193414	0.153392	ADM	1
DOID:13042	persistent fetal circulation syndrome	2023-01-14	13/10312	0.0175164	0.193414	0.153392	ADM	1
DOID:13603	obstructive jaundice	2023-01-14	13/10312	0.0175164	0.193414	0.153392	ADM	1
DOID:11202	primary hyperparathyroidism	2023-01-14	16/10312	0.021518	0.193414	0.153392	ADM	1
DOID:5408	Paget's disease of bone	2023-01-14	16/10312	0.021518	0.193414	0.153392	ALPL	1
DOID:182	calcinosis	2023-01-14	17/10312	0.0228485	0.193414	0.153392	SAMD9	1
DOID:3087	gingivitis	2023-01-14	22/10312	0.0294758	0.193414	0.153392	ADM	1
DOID:0060786	hypomyelinating leukodystrophy	2023-01-14	24/10312	0.032115	0.193414	0.153392	TMEM106B	1
DOID:13133	HELLP syndrome	2023-01-14	25/10312	0.0334321	0.193414	0.153392	ADM	1
DOID:11400	pyelonephritis	2023-01-14	26/10312	0.0347475	0.193414	0.153392	ADM	1
DOID:2744	pyelitis	2023-01-14	26/10312	0.0347475	0.193414	0.153392	ADM	1
DOID:11123	Henoch-Schoenlein purpura	2023-01-14	31/10312	0.0412998	0.193414	0.153392	ADM	1
DOID:13129	severe pre-eclampsia	2023-01-14	31/10312	0.0412998	0.193414	0.153392	ADM	1
DOID:1591	renovascular hypertension	2023-01-14	31/10312	0.0412998	0.193414	0.153392	ADM	1
DOID:3479	uveal cancer	2023-01-14	31/10312	0.0412998	0.193414	0.153392	EIF1AX	1
DOID:6039	uveal melanoma	2023-01-14	31/10312	0.0412998	0.193414	0.153392	EIF1AX	1
DOID:10588	adrenoleukodystrophy	2023-01-14	32/10312	0.0426053	0.193414	0.153392	ADM	1
DOID:13543	hyperparathyroidism	2023-01-14	32/10312	0.0426053	0.193414	0.153392	ADM	1
DOID:205	hyperostosis	2023-01-14	32/10312	0.0426053	0.193414	0.153392	ALPL	1
DOID:9809	hypersensitivity vasculitis	2023-01-14	32/10312	0.0426053	0.193414	0.153392	ADM	1
DOID:10575	calcium metabolism disease	2023-01-14	33/10312	0.0439092	0.193414	0.153392	SAMD9	1
DOID:13809	familial combined hyperlipidemia	2023-01-14	33/10312	0.0439092	0.193414	0.153392	ALPL	1
DOID:3443	mammary Paget's disease	2023-01-14	33/10312	0.0439092	0.193414	0.153392	ALPL	1
DOID:10487	Hirschsprung's disease	2023-01-14	34/10312	0.0452114	0.193414	0.153392	AEBP2	1
DOID:11713	diabetic angiopathy	2023-01-14	34/10312	0.0452114	0.193414	0.153392	ADM	1
DOID:1557	hypersensitivity reaction type III disease	2023-01-14	35/10312	0.0465119	0.193414	0.153392	ADM	1
DOID:4676	uremia	2023-01-14	35/10312	0.0465119	0.193414	0.153392	ALPL	1
DOID:11201	parathyroid gland disease	2023-01-14	36/10312	0.0478108	0.193414	0.153392	ADM	1
DOID:11372	megacolon	2023-01-14	36/10312	0.0478108	0.193414	0.153392	AEBP2	1
DOID:1483	gingival disease	2023-01-14	36/10312	0.0478108	0.193414	0.153392	ADM	1
DOID:403	mouth disease	2023-02-14	266/10312	0.049187	0.193414	0.153392	ALPL/ADM	2
